# A Systematic Review and Meta-analysis Examining the Impact of Incident Postoperative Delirium on Mortality

Gavin M. Hamilton, M.D., M.Sc., Kathleen Wheeler, M.D., B.Sc., Joseph Di Michele, B.H.Sc., Manoj M. Lalu, M.D., Ph.D., Daniel I. McIsaac, M.D., M.P.H.

## ABSTRACT

**Background:** Delirium is an acute and reversible geriatric syndrome that represents a decompensation of cerebral function. Delirium is associated with adverse postoperative outcomes, but controversy exists regarding whether delirium is an independent predictor of mortality. Thus, we assessed the association between incident postoperative delirium and mortality in adult noncardiac surgery patients.

**Methods:** A systematic search was conducted using Cochrane, MEDLINE/PubMed, Cumulative Index to Nursing and Allied Health Literature, and Embase. Screening and data extraction were conducted by two independent reviewers. Pooled-effect estimates calculated with a random-effects model were expressed as odds ratios with 95% CIs. Risk of bias was assessed using the Cochrane Risk of Bias Tool for Non-Randomized Studies.

**Results:** A total of 34 of 4,968 screened citations met inclusion criteria. Risk of bias ranged from moderate to critical. Pooled analysis of unadjusted event rates (5,545 patients) suggested that delirium was associated with a four-fold increase in the odds of death (odds ratio = 4.12 [95% CI, 3.29 to 5.17];  $I^2 = 24.9\%$ ). A formal pooled analysis of adjusted outcomes was not possible due to heterogeneity of effect measures reported. However, in studies that controlled for prespecified confounders, none found a statistically significant association between incident postoperative delirium and mortality (two studies in hip fractures;  $n = 729$ ) after an average follow-up of 21 months. Overall, as study risk of bias decreased, the association between delirium and mortality decreased.

**Conclusions:** Few high-quality studies are available to estimate the impact of incident postoperative delirium on mortality. Studies that controlled for prespecified confounders did not demonstrate significant independent associations of delirium with mortality. (**ANESTHESIOLOGY 2017; 127:78-88**)

**D**ELIRIUM is a fluctuating, neuropsychiatric geriatric syndrome that represents a decompensation of cerebral function and can result in acute and reversible cognitive decline.<sup>1</sup> Causes of delirium are multifactorial and can be related to acute physical stressors, such as surgery.<sup>2</sup> More than 51-million surgeries occur annually in North America,<sup>3</sup> and in some high-risk surgical populations up to 50% of patients may develop postoperative delirium.<sup>2,4,5</sup>

Despite the growing body of evidence that associates delirium with mortality,<sup>6-9</sup> the causal relationship of delirium with mortality is difficult to ascertain due to the high risk of confounding bias. Many of the strongest risk factors for postoperative delirium, such as advanced age, comorbidity, preexisting cognitive dysfunction, and high-risk surgery, are also independent risk factors for mortality.<sup>7,10</sup> Because delirium is a disease state and not an intervention, causal inference depends on the conduct and reporting of high-quality observational studies.

### What We Already Know about This Topic

- Although the occurrence of delirium in the perioperative period is associated with increased mortality, it is not clear whether delirium *per se* is an independent predictor of mortality.
- A meta-analysis of the extant literature on perioperative delirium in patients undergoing noncardiac surgery was performed. Importantly, the risk of bias, particularly with respect to confounding variables that may independently contribute to mortality, in each of the reviewed studies was determined.

### What This Article Tells Us That Is New

- Patients who develop delirium are at increased risk of death.
- However, in the studies with reduced bias and adequate control for confounding, an independent association between delirium and mortality was not apparent.

Studies to date have produced conflicting results regarding the association between postoperative delirium and mortality in the perioperative setting. A recent study conducted

Supplemental Digital Content is available for this article. Direct URL citations appear in the printed text and are available in both the HTML and PDF versions of this article. Links to the digital files are provided in the HTML text of this article on the Journal's Web site ([www.anesthesiology.org](http://www.anesthesiology.org)).

Submitted for publication October 4, 2016. Accepted for publication March 21, 2017. Department of Anesthesiology and Pain Medicine (G.M.H., M.M.L., D.I.M.), Faculty of Medicine (K.W., J.D.), Regenerative Medicine Program (M.M.L.), Clinical Epidemiology Program (D.I.M.), and The Ottawa Hospital Research Institute (M.M.L., D.I.M.), University of Ottawa, Ottawa, Ontario, Canada.

Copyright © 2017, the American Society of Anesthesiologists, Inc. Wolters Kluwer Health, Inc. All Rights Reserved. Anesthesiology 2017; 127:78-88

by Gottschalk *et al.*<sup>11</sup> in elderly patients with hip fracture demonstrated that incident postoperative delirium was not independently associated with mortality. In contrast, Dubljanin-Raspopović *et al.*<sup>12,13</sup> found that, in a similar population of patients with hip fracture, postoperative delirium was an independent predictor of mortality. The divergent findings may be at least partly explained by the differing approach to control for confounding. Although both studies included variables to account for age, sex, and American Society of Anesthesiology (ASA) score, Gottschalk *et al.*<sup>11</sup> additionally controlled for preexisting cognitive impairment, as well as several postoperative variables. Dubljanin-Raspopović *et al.*<sup>12,13</sup> did not account for baseline cognitive function, which is the strongest known predictor of delirium<sup>14,15</sup> and an independent predictor of postoperative mortality.<sup>16,17</sup> This comparison exemplifies the potential fragility of the delirium–mortality association depending on choice of confounders included in adjusted models.

Existing systematic reviews have examined the association of delirium with mortality in mixed patient populations; however, none of these studies focused specifically on surgical patients who develop incident postoperative delirium.<sup>8,18</sup> Furthermore, to our knowledge, no existing review uses a systematic approach to account for the multiple sources of confounding known to be pertinent to the delirium–mortality relationship in perioperative patients. Therefore, we conducted a systematic review to specifically examine the independent association of incident postoperative delirium with mortality in adult noncardiac surgery patients.

## Materials and Methods

We carried out this systematic review and meta-analysis of prospective observational studies following recommendations of the Meta-Analysis of Observational Studies in Epidemiology group.<sup>19</sup> The protocol for the systematic review was registered with the International Prospective Register of Systematic Reviews (CRD42015029805, [http://www.crd.york.ac.uk/PROSPERO/display\\_record.asp?ID=CRD42015029805](http://www.crd.york.ac.uk/PROSPERO/display_record.asp?ID=CRD42015029805)) and was conducted in accordance with Cochrane Collaboration guidelines.<sup>20</sup> This manuscript is reported as per the Preferred Reporting Items for Systematic Reviews and Meta-Analysis.<sup>21</sup>

### Search Strategy

Cochrane, MEDLINE, Cumulative Index to Nursing and Allied Health Literature, and Embase databases were systematically searched using a strategy designed in consultation with an information specialist. The search strategy was then reviewed and finalized using the peer review of electronic search strategy checklist.<sup>22</sup> Key words for delirium (*i.e.*, delirium, delirious, acute confusion, cognitive dysfunction, and cognitive impairment) were combined with surgery-specific key words (*i.e.*, postoperative complications, postoperative care, postsurgery, noncardiac surgery, surgical patients, and

hip fractures) and mortality key words (*i.e.*, hospital mortality and death; see Supplemental Digital Content 1, <http://links.lww.com/ALN/B434>, which outlines our full search strategy). Abstracts and other gray literature were excluded, because methodologic descriptions would be insufficient to assess the risk of bias and validity of study findings. The bibliographies of the included studies were hand searched to identify any additional articles that met our inclusion criteria. There were no language restrictions. Our search was restricted to articles after January 1981, because a formal nomenclature to differentiate delirium from dementia was first established with the Diagnostic and Statistical Manual of Mental Disorders (3rd edition) in 1980.<sup>23</sup>

### Inclusion and Exclusion Criteria

Eligible studies were included if they met the following criteria: (1) adults (>18 yr of age) undergoing noncardiac surgery; (2) incident postoperative delirium (new-onset delirium that occurs during the postoperative course) was prospectively identified using a validated instrument or diagnosed prospectively based on Diagnostic and Statistical Manual of Mental Disorders criteria; and (3) reported quantitative data (*i.e.*, event rates, risk ratios [RRs], odds ratios [ORs], or hazard ratios [HRs]) to measure the association between delirium and mortality. Studies were excluded if: (1) there were cardiac surgery patients, because the risk factors for delirium (*e.g.*, cardiopulmonary bypass) and nature of clinical care (*e.g.*, routine intensive care unit admission after surgery) differ significantly between cardiac and noncardiac surgical populations; (2) surgery-specific subgroups and their outcome data could not be extracted independent of other types of patients (*e.g.*, noncardiac surgery patients combined with nonsurgical or cardiac surgical patients); (3) the majority of patients had preexisting (*i.e.*, not incident postoperative) delirium; or (4) the subgroup with incident delirium and the patient outcome data could not be extracted independent of preexisting delirium cases (*i.e.*, present before surgery).

### Selection of Included Studies

Titles and abstracts of identified studies were independently screened in duplicate (G.M.H., K.W., J.D.). Study screening and selection, as well as data collection, were performed using DistillerSR (Evidence Partners, Canada). Relevant abstracts were selected and the full-text articles reviewed. Any disagreements were resolved by consensus decision in discussion with the senior team members (D.I.M., M.M.L.). Study design, demographic data, exposure, and outcome data were extracted. A calibrating exercise was performed to ensure that interrater agreement was high for both the study selection and data extraction. After the data extraction, authors were contacted to verify missing data and offer clarifications as needed.

### Assessment of Risk of Bias

Risk of bias was assessed in duplicate by the primary author and senior author using the method outlined in the Cochrane Risk of Bias Tool for Non-Randomized Studies.<sup>24</sup> The risk of bias was assessed as low, moderate, high, or critical for each of confounding bias, selection bias, measurement bias (outcome or exposure), missing data bias, and selection bias. Any disagreement was resolved by consensus.

### Statistical Analysis

For the unadjusted analysis, we included any study that reported the effect of incident delirium on mortality and extracted the number of events relative to the total number of participants in the delirium and control groups (*i.e.*, crude event rates).

For the primary adjusted analysis, we extracted quantitative data (*i.e.*, ORs, RRs, and HRs) that were adjusted for prespecified key confounders reflecting the association between incident delirium and mortality. In keeping with Witlox *et al.*,<sup>8</sup> our primary analysis included only studies that adjusted for age, sex, comorbidity, and baseline cognitive status. Because ASA score describes illness severity and predicts both delirium and mortality, studies controlling for ASA score were considered to account for comorbid illness. To identify additional perioperative confounders, we searched the literature for reviews or key articles that described risk factors for both postoperative mortality and postoperative delirium.<sup>10,14,25,26</sup> We then identified key variables that predicted both delirium and mortality. Based on this search, the type and urgency of surgery were also identified as key perioperative confounding variables for delirium and mortality. Therefore, these variables were included in our list of required adjusted variables for a study to be included in our the primary analysis (table 1). Based on best-practice recommendations, control for confounding was determined to be inadequate if the key variables were not included in the final adjusted model, despite clinical and epidemiologic grounds for their inclusion.<sup>27–30</sup> We also planned a secondary adjusted analysis, in which we included measures of association (*i.e.*, ORs, RRs, and HRs) that were adjusted for any confounders.

Where possible, we performed a meta-analysis for the primary outcome of mortality. Pooled-effect outcomes were calculated using inverse variance methods with random-effects models and expressed as ORs and 95% CIs. Heterogeneity was

assessed using the  $I^2$  statistic. Statistical analyses were performed in STATA 10.0 (StataCorp LLC, Texas). Figures were created in RevMan 5.3 (The Cochrane Collaboration, Denmark). *P* values of less than 0.05 were considered statistically significant.

### Results

Our search identified 4,968 citations, of which 445 citations were selected for a full-text review. After full-text review, a total of 34 studies met our eligibility criteria (see Supplemental Digital Content 2, <http://links.lww.com/ALN/B435>, which lists all of the studies that met our primary, secondary, and tertiary analyses); 2 studies met criteria for our primary analysis, and 6 studies met criteria for secondary analysis (table 2). The three most common reasons for excluding a citation after full-text review were as follows: (1) conference abstract only citation; (2) the definition of delirium was not validated or it was reported as an outcome variable (not an exposure); or (3) no mortality data were reported. Thirty four of the included studies were published in English, one in Korean,<sup>31</sup> and one in Spanish.<sup>32</sup> A Preferred Reporting Items for Systematic Reviews and Meta-Analysis flowchart outlining the search results is shown in figure 1.<sup>33</sup>

Of the 34 studies ( $n = 7,738$  patients) identified through our search, 21.5% of patients developed incident postoperative delirium, and 10.8% of patients died after surgery. Of those patients found to be delirious, 21.8% died compared with an 8.7% mortality rate for nondelirious patients. The mortality outcome ascertainment time frame varied between studies, including in-hospital mortality (8 studies;  $n = 1,274$ ), 30 days to 6 months (13 studies;  $n = 2,413$ ), and more than 6 months (13 studies;  $n = 4,051$ ). For studies that reported multiple mortality outcome ascertainment time frame variables, we used the longest time frame reported for our analysis.

### Risk of Bias

Overall and categorical risk of bias for each included study in the primary and secondary analyses are summarized in table 3. There was 80% agreement between raters across all of the studies and risk of bias domains. At no time did any disagreement on ratings for a given domain for a given study differ by more than 1 level (*e.g.*, if one rater said moderate, the other rater would have said low or serious, not critical). Lack of control for confounding and bias related to the selection of the reported result were the two categories that resulted in the high and critical risks of bias found. As a result, there were 2 studies at a moderate risk of bias, 6 with high risk of bias, and 26 studies that were of a critical risk of bias.

### Impact of Incident Postoperative Delirium on Outcomes

Of the studies that met our inclusion criteria, there were 2 studies ( $n = 729$ ) that adjusted for our prespecified key confounders (fig. 2).<sup>11,34,35</sup> Both studies were conducted in patients who were undergoing emergency hip fracture surgery. A pooled analysis of these two studies was not possible, because one citation reported an adjusted HR<sup>11</sup> and one

**Table 1.** Key Confounders in the Delirium–Mortality Relationship

| Key Confounders                  |
|----------------------------------|
| Age                              |
| Sex                              |
| Comorbidity ( <i>e.g.</i> , ASA) |
| Previous cognitive impairment    |
| Surgery type                     |
| Surgery urgency                  |

ASA = American Society of Anesthesiology.

**Table 2.** Studies Included in the Primary and Secondary Analysis

| First Author (yr)                                                                     | Study Design       | Study Type                    | Surgery Urgency                          | Study Size, n | Age (Mean), yr     | Sex, % Women     | ASA, $\leq 2$ | Delirium Diagnosis                                     | Baseline Cognitive Impairment (Proportion) | Mortality (Length of Follow-Up)* | Crude OR (Unless Otherwise Specified) (95% CI) | Adjusted OR (Unless Otherwise Specified) (95% CI) | Primary/Secondary Analysis | Event Rates (for Mortality)                   |
|---------------------------------------------------------------------------------------|--------------------|-------------------------------|------------------------------------------|---------------|--------------------|------------------|---------------|--------------------------------------------------------|--------------------------------------------|----------------------------------|------------------------------------------------|---------------------------------------------------|----------------------------|-----------------------------------------------|
| Goftschalk (2015) <sup>11</sup>                                                       | Prospective cohort | Orthopedics (hip fracture)    | Emergency                                | 459           | 81.3               | 73               | 0.16          | CAM                                                    | Dementia (0.26)                            | 49 mo (mean F/U)                 | HR 1.65 (95% CI: 1.32 to 2.06)                 | HR = 1.2 (0.93–1.54)                              | Primary                    | Delirious: 127/151<br>Nondelirious: 213/308   |
| Radinovic (2014) <sup>35</sup> , Radinovic (2015) <sup>34</sup>                       | Prospective cohort | Orthopedics (hip fracture)    | Emergency                                | 270           | 78.1               | 74               | 0.19          | CAM                                                    | GDS >6 (0.31), SPMSQ (mean = 5.7)          | 30 d                             | 3.47 <sup>b</sup> (95% CI: 1.29 to 10.83)      | 0.46 (0.13–1.65)                                  | Primary                    | Delirious: 21/143<br>Nondelirious: 6/127      |
| Veiga (2013) <sup>37</sup>                                                            | Prospective cohort | General surgery (hepatectomy) | Elective                                 | 70            | 59 <sup>†</sup>    | 50               | 0.33          | ICDSC                                                  | N/A                                        | 6 mo                             | 13.78 (95% CI: 3.4 to 55.6)                    | 9.33 (1.35–64.61)                                 | Secondary                  | Delirious: 9/17<br>Nondelirious: 4/53         |
| Abelha (2013) <sup>36</sup> §, Veiga (2012) <sup>38</sup>                             | Prospective cohort | Major noncardiac (mixed)      | Elective                                 | 562           | 66 <sup>†</sup>    | 37               | 0.34          | ICDSC                                                  | N/A                                        | 6 mo                             | 4.26 <sup>†</sup> (95% CI: 2.37 to 7.53)       | 2.562 (1.36–4.82)                                 | Secondary                  | Delirious: 28/89<br>Nondelirious: 46/473      |
| Dubljanin-Raspopović (2012) <sup>13</sup> , Dubljanin-Raspopović (2015) <sup>12</sup> | Prospective cohort | Orthopedics (hip fracture)    | Emergency                                | 344           | 78.2               | 80               | 0.58          | CAM                                                    | Cognitive impairment (SPMSQ) <3 (0.11)     | 12 mo                            | 4.67 (95% CI: 2.97 to 7.34)                    | 2.31 (1.36–3.90)                                  | Secondary                  | Delirious: 28/43<br>Nondelirious: 59/301      |
| Bickel (2008) <sup>39</sup>                                                           | Prospective cohort | Orthopedics (hip surgery)     | Mixed (elective = 0.72, fracture = 0.28) | 200           | 73.8               | 69.5             | N/A           | CAM                                                    | MMSE (average = 27.1)                      | 38 mo                            | 4.8 (95% CI: 2.1 to 10.8)                      | 1.7 (0.6–5.0)                                     | Secondary                  | Delirious: 15/41<br>Nondelirious: 17/159      |
| Furlaneto (2007) <sup>42</sup>                                                        | Prospective cohort | Orthopedics (hip fracture)    | Emergency                                | 85            | 80.26              | 83.5             | N/A           | CAM                                                    | Dementia (0.43)                            | 48 mo                            | (HR) 1.83 (no CIs reported)                    | HR = 1.28 (0.66–2.47)                             | Secondary                  | Delirious: 15/25#<br>Nondelirious: 24/60#     |
| Nightingale (2001) <sup>40</sup> , Holmes (2000) <sup>41</sup>                        | Prospective cohort | Orthopedics (hip fracture)    | Emergency                                | 316**         | 80.3 <sup>††</sup> | 78 <sup>††</sup> | N/A           | Geriatric mental state (AGECAT); delirium rating scale | N/A                                        | 2 yr                             | 3.32 <sup>†</sup> (1.99–5.56)                  | HR = 2.404 <sup>††</sup> (1.66–3.48)              | Secondary                  | Delirious: 62/108§§<br>Nondelirious: 60/208§§ |

\*Data include the longest mortality frame reported. †Data were calculated using STATA 10.0 (OR with Cornfield approximation using cci command). ‡Data show the median. §Data are from Abelha et al. 2013.<sup>36</sup> ||Data are from Dubljanin-Raspopović et al. 2012.<sup>13</sup> #Data were calculated using the predicted percentages reported in the text (Furlaneto et al. 2007).<sup>42</sup> \*\*Data only included well and delirious patients. ††Data were calculated from table 1 in Holmes (2000).<sup>41</sup> §§Data are from Holmes (2000).<sup>41</sup> §§Data are from Nightingale (2001).<sup>40</sup> the same population as Holmes (2000).<sup>41</sup> AGECAT = Automated Geriatric Examination for Computer Assisted Taxonomy; CAM = confusion assessment method; F/U = follow-up; GDS = geriatric depression scale; HR = hazard ratio; ICDSC = Intensive Care Delirium Screening Checklist; MMSE = Mini-Mental State Examination; N/A = not applicable; OR = odds ratio; SPMSQ = Short Portable Mental Status Questionnaire.



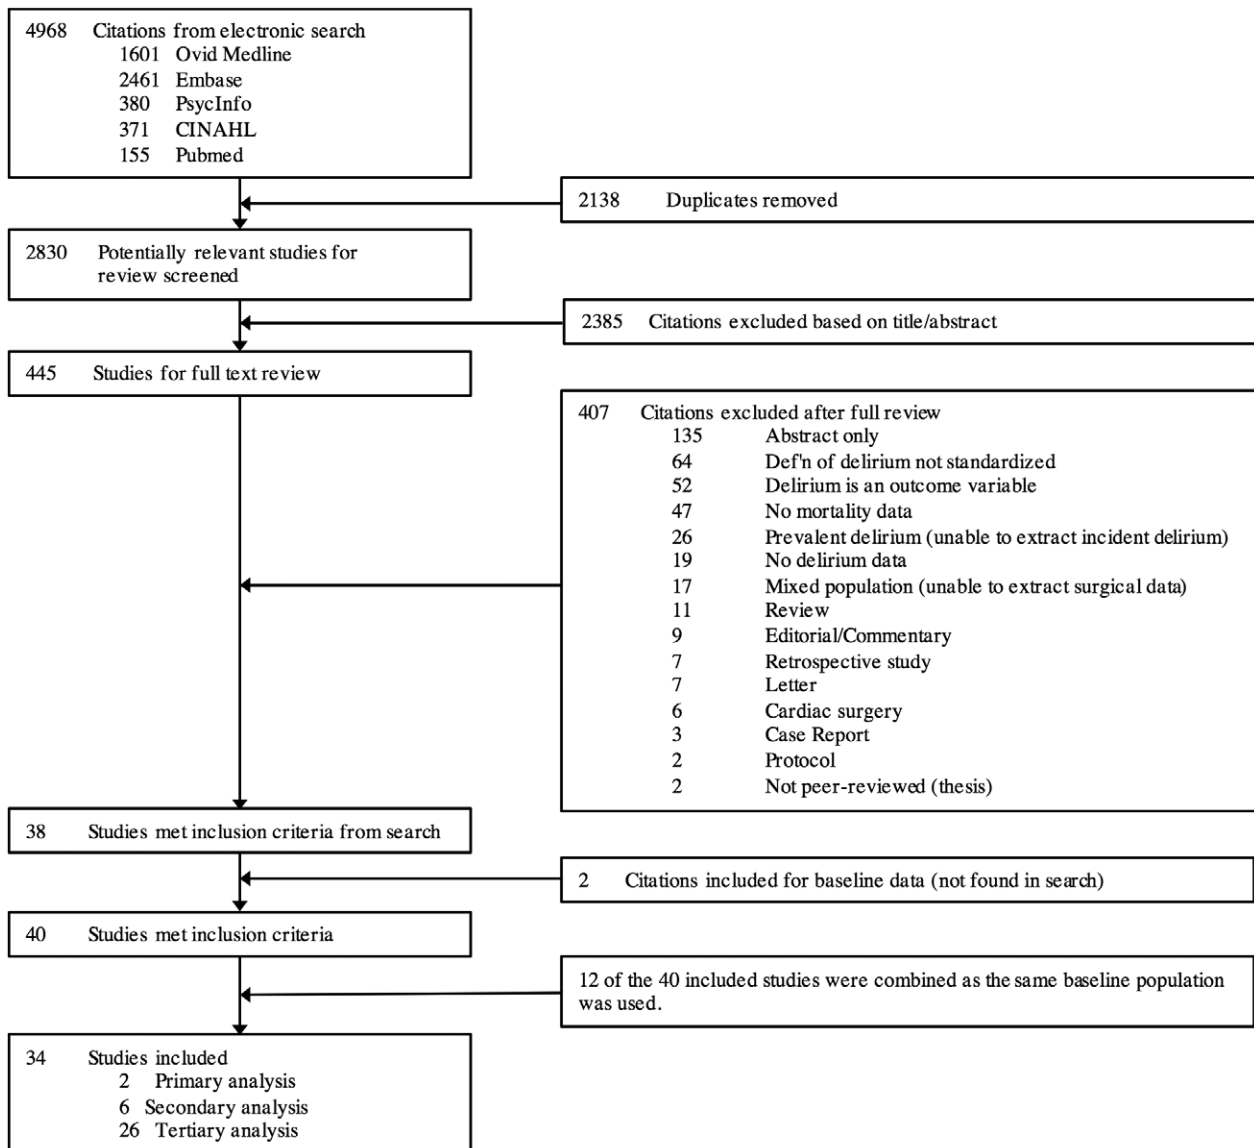

**Fig. 1.** Identification, review, and selection of articles included in the systematic review. CINAHL = Cumulative Index to Nursing and Allied Health Literature.

reported an adjusted OR.<sup>34</sup> Neither of these studies found a statistically significant association between incident postoperative delirium and mortality after an average follow-up of 21 months (range, 30 days to 49 months). Their adjusted effect estimates were HR at 1.2 (95% CI, 0.93 to 1.54)<sup>11</sup> and OR at 0.46 (95% CI, 0.13 to 1.65),<sup>34,35</sup> respectively.

There were six additional studies<sup>12,13,36–42</sup> ( $n = 1,577$ ) that calculated adjusted effect estimates to assess the effect of postoperative delirium on mortality, but these authors did not include all of our predefined key confounders in their adjusted effect estimate (table 3). The six adjusted studies were conducted in orthopedic hip fracture patients,<sup>12,13,40–42</sup> hip surgery,<sup>39</sup> general surgery,<sup>37</sup> and a mixed surgical population.<sup>36,38</sup> Given the heterogeneity of the adjusted effect measure types reported, it was not possible to conduct a pooled analysis. Four studies found that delirium was an

independent predictor of mortality,<sup>12,13,36,38,40,41</sup> whereas two studies<sup>39,42</sup> did not (fig. 3). These studies presented an average follow-up of 26 months (range, 6 to 48 months).

Twenty seven<sup>11–13,32,34–61</sup> of the 34 studies ( $n = 5,545$ ) presented unadjusted event rates available for pooled analysis (fig. 4). Seven studies were not included in the pooled analysis because two studies<sup>62–64</sup> had no event rates and five studies<sup>31,65–68</sup> had zero values in their two-by-two tables, making it impossible to obtain an OR.<sup>69</sup> The 27 studies used for pooled analysis had a mean follow-up of 12.3 months (range, 1 to 60 months), and 355 of 1,199 patients with delirium (29.6%) had an increased risk of death compared with 440 of 4,352 control subjects (10.1%). The pooled OR suggested that incident postoperative delirium was associated with an unadjusted four-fold increase in the odds of mortality (OR = 4.12 [95% CI, 3.29 to 5.17];  $I^2 = 24.9\%$ ).

**Table 3.** Risk of Bias Assessment Showing the Methodologic Quality of the Studies Included in the Primary and Secondary Analyses and Confounding Variables Included in the Delirium–Mortality Effect Estimate (Primary and Secondary Analyses Only)

| Analysis<br>(First Author)                                            | Risk of Bias Assessment    |                                                                  |                                                          |                                |                                                | Confounding Variables Included in the<br>Delirium–Mortality Effect Estimate |                            |     |                    |             |                                     |                 |                    |                               |
|-----------------------------------------------------------------------|----------------------------|------------------------------------------------------------------|----------------------------------------------------------|--------------------------------|------------------------------------------------|-----------------------------------------------------------------------------|----------------------------|-----|--------------------|-------------|-------------------------------------|-----------------|--------------------|-------------------------------|
|                                                                       | Bias due to<br>Confounding | Bias due to<br>Selection of<br>Participants<br>into the<br>Study | Bias due to<br>Measurement<br>of Outcomes<br>or Exposure | Bias due to<br>Missing<br>Data | Bias due to<br>Measure-<br>ment of<br>Outcomes | Bias due to<br>Selection of<br>the Reported<br>Result                       | Overall<br>Risk of<br>Bias | Age | Sex<br>(e.g., ASA) | Comorbidity | Previous<br>Cognitive<br>Impairment | Surgery<br>Type | Surgery<br>Urgency | Adjusted<br>OR/HR<br>(95% CI) |
| Primary analysis                                                      |                            |                                                                  |                                                          |                                |                                                |                                                                             |                            |     |                    |             |                                     |                 |                    |                               |
| Gottschalk<br>(2015) <sup>11</sup>                                    | ●                          | ●                                                                | ●                                                        | ●                              | ●                                              | ●                                                                           | ●                          | ●   | ●                  | ●           | ●                                   | ●               | ●                  | HR = 1.2<br>(0.93–1.54)       |
| Radinovic<br>(2015/2014) <sup>34,35</sup>                             | ●                          | ●                                                                | ●                                                        | ●                              | ●                                              | ●                                                                           | ●                          | ●   | ●                  | ●           | ●                                   | ●               | ●                  | OR = 0.46<br>(0.13–1.65)      |
| Secondary analysis                                                    |                            |                                                                  |                                                          |                                |                                                |                                                                             |                            |     |                    |             |                                     |                 |                    |                               |
| Dubljanin-<br>Raspopovic<br>(2015/2012) <sup>12,13*</sup>             | ●                          | ●                                                                | ●                                                        | ●                              | ●                                              | ●                                                                           | ●                          | ●   |                    |             |                                     | ●               |                    | OR = 2.31<br>(1.36–3.90)      |
| Abelha (2013) <sup>36,37</sup> ,<br>Viega (2012) <sup>38</sup>        | ●                          | ●                                                                | ●                                                        | ●                              | ●                                              | ●                                                                           | ●                          | ●   | ●                  | ●           |                                     | ●               |                    | OR = 2.562<br>(1.36–4.82)     |
| Viega (2013) <sup>37</sup>                                            | ●                          | ●                                                                | ●                                                        | ●                              | ●                                              | ●                                                                           | ●                          | ●   | ●                  |             |                                     | ●               |                    | OR = 9.33<br>(1.35–64.61)     |
| Bickel (2008) <sup>39</sup>                                           | ●                          | ●                                                                | ●                                                        | ●                              | ●                                              | ●                                                                           | ●                          | ●   | ●                  | ●           | ●                                   | ●               |                    | OR = 1.7<br>(0.6–5.0)         |
| Furlaneto<br>(2007) <sup>42†</sup>                                    | ●                          | ●                                                                | ●                                                        | ●                              | ●                                              | ●                                                                           | ●                          |     |                    | ●           | ●                                   | ●               | ●                  | HR = 1.28<br>(0.66–2.47)      |
| Nightingale<br>(2001) <sup>40</sup> , Holmes<br>(2000) <sup>41‡</sup> | ●                          | ●                                                                | ●                                                        | ●                              | ●                                              | ●                                                                           | ●                          | ●   | ●                  | ●           |                                     | ●               | ●                  | HR = 2.404<br>(1.66–3.48)     |

\*Data used backward regression (without controlling for sex or ASA) and only included significant variables in the model. †Univariate analysis was performed with confounders and then included significant variables into the model. ‡It is not clear how concurrent diagnoses of delirium/dementia were handled.

Risk of bias rating scale: low = ●, moderate = ●, serious = ●, critical = ●.

ASA = American Society of Anesthesiologists; HR = hazard ratio; OR = odds ratio.

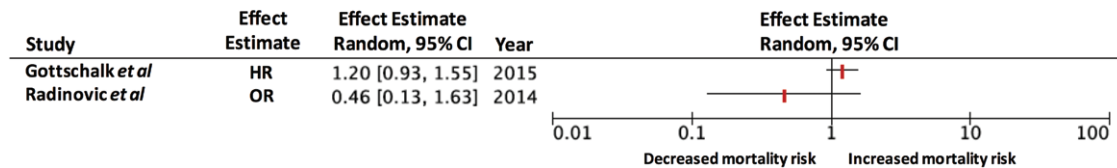

**Fig. 2.** Primary analysis: forest plot of adequately adjusted event rates (all key confounders included in the statistical model). Note that the point estimates and lower CI values shown in this figure are identical to values found in the articles. Given the variation in statistical techniques used to obtain adjusted odds ratios (ORs), the upper CI value in this figure may not be identical to reported values found in the individual studies (see Supplemental Digital Content 2, <http://links.lww.com/ALN/B435>, which lists all of the studies that met our primary, secondary, and tertiary analyses). HR = hazard ratio.

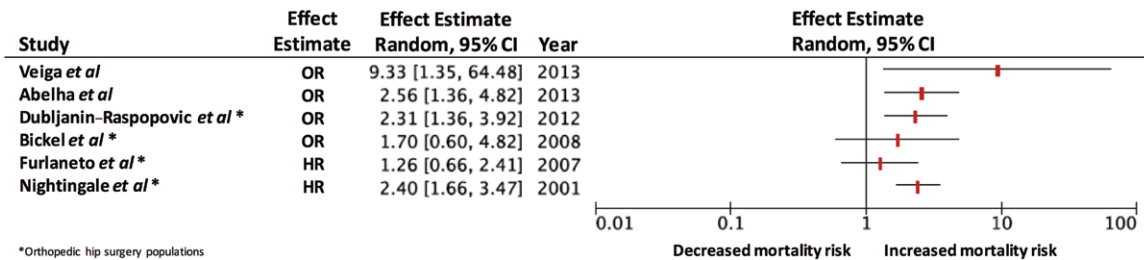

\*Orthopedic hip surgery populations

**Fig. 3.** Secondary analysis: forest plot of inadequately adjusted event rates (not all of the key confounders included in the statistical model). Note that the point estimates and lower CI values shown in this figure are identical to values found in the articles. Given the variation in statistical techniques used to obtain adjusted odds ratios (ORs), the upper CI value in this figure may not be identical to reported values found in the individual studies (see Supplemental Digital Content 2, <http://links.lww.com/ALN/B435>, which lists all of the studies that met our primary, secondary, and tertiary analyses). HR = hazard ratio.

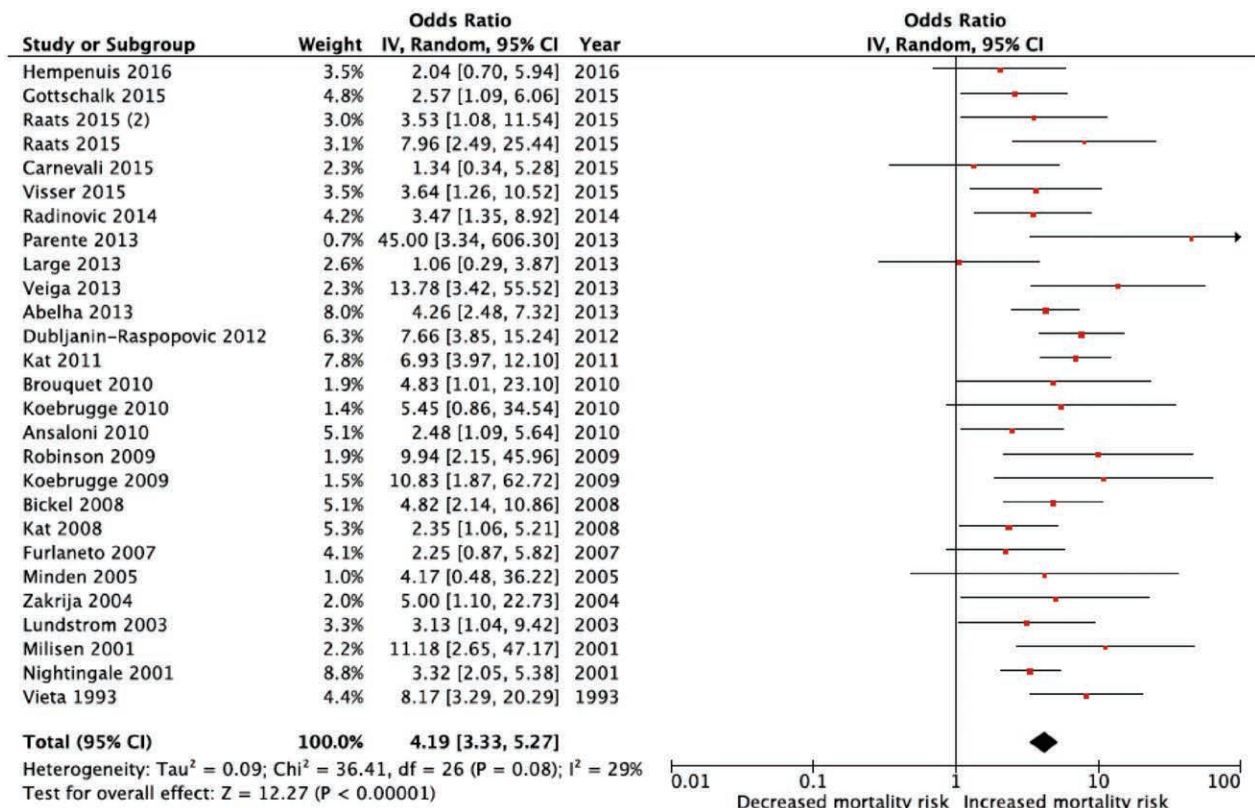

**Fig. 4.** Tertiary analysis: forest plot of unadjusted event rates available for pooled analysis. Note THAT The point estimates and lower CI values shown in this figure are identical to values found in the articles. Given the variation in statistical techniques used to obtain adjusted odds ratios, the upper CI value in this figure may not be identical to reported values found in the individual studies (see Supplemental Digital Content 2, <http://links.lww.com/ALN/B435>, which lists all of the studies that met our primary, secondary, and tertiary analyses).  $df$  = degrees of freedom.

## Discussion

On an unadjusted basis, death is far more common in patients who become delirious after surgery. However, based on our findings there is currently insufficient evidence to support a causal relationship between delirium and postoperative mortality. Because inspection of forest plots when studies were grouped by risk of confounding bias demonstrated a decrease in the effect size estimates for delirium as control for confounding improved, this suggests that, within the perioperative population, either the true effect of postoperative delirium on mortality risk may be substantially smaller than previously reported, or delirium may simply be an indicator of underlying factors that predispose a patient to an increased risk of death rather than a true independent risk factor. We found only two studies that adjusted for our predefined key confounding variables, and in both studies no significant association was found between incident postoperative delirium and mortality.

The major strength of this study is that we sought to investigate the independent nature of delirium as an exposure on mortality in a fashion specific to the perioperative setting. This systematic review and meta-analysis is, to our knowledge, the first study of its kind to systematically synthesize data on the impact of incident delirium on mortality in perioperative patients. Furthermore, our protocol was registered *a priori* and designed in keeping with best-practice methods, which should limit the risk of bias in our results. The present study also has limitations. First, no included study was at low risk of bias. Second, although this study was restricted to noncardiac surgical patients, the surgical populations remained heterogeneous. Third, the mortality outcome windows were variable. The variable duration of mortality follow-up from the surgical period may have altered the causative impact that a perioperative delirious episode would have on mortality; however, given a recent study by Smith *et al.*<sup>70</sup> that reinforced that early mortality risk stratification is consistent over the first postoperative year, we believed that it was appropriate not to stratify by outcome ascertainment window despite the variations in follow-up duration between studies. Fourth, we were unable to use data on the duration of the delirium given the heterogeneity and paucity of our data (inconsistently reported by 9 of 34 studies). Finally, the cause of death was not examined in our review; however, such data could help to explain a possible causal relationship between delirium and mortality and should be considered in future prospective studies.

We focused only on mortality as an outcome because mortality is reliably measured, is of importance to multiple stakeholders in the perioperative setting, and confounding variables in the delirium–mortality relationship are relatively well defined. Other outcomes are also relevant to patients, clinicians, and the healthcare system; however, a methodologically sound analysis of other outcomes (*e.g.*, complications, length of stay, discharge disposition, or quality of

recovery) was not possible due to limitations in measurement of these outcomes and unclear sources of confounding.

Delirium is common after surgery, particularly in older patient populations.<sup>7</sup> At baseline, patients who develop delirium tend to differ substantially from patients who do not become delirious, and these differences (*e.g.*, advanced age, comorbidity burden, baseline cognitive status, surgical indication and urgency, and sex) are also consistently associated with an increased risk of death. Therefore, the delirium–mortality relationship is likely to be highly confounded. Because of this confounded relationship, any attempt at identifying an independent association between delirium and mortality requires careful control of these factors. In the two studies that we identified with adequate confounder control,<sup>11,34,35</sup> no significant independent association of delirium on postoperative mortality was identified. In contrast, Witlox *et al.*<sup>8</sup> examined the risk of delirium on postdischarge mortality among all of the hospitalized patients. In their primary analysis that included effect estimates from seven studies (three of which included surgical patients) that controlled for the confounders age, sex, comorbidity or illness severity, and baseline dementia, they found a significant increase in mortality risk (pooled HR = 1.95 [95% CI, 1.51 to 2.52]) associated with delirium. However, their result must be interpreted in consideration of additional sources of bias, such as combining substantially heterogeneous populations, combining both prevalent and incident delirium, and a lack of control for confounders specific to the perioperative setting. In fact, none of the surgical studies included in the primary analysis by Witlox *et al.*<sup>8</sup> met our *a priori* criteria for adequate confounder control, mainly due to a lack of control for surgery-specific confounders. A secondary analysis from Witlox *et al.*<sup>8</sup> that combined unadjusted effect estimates from 17 strictly surgical studies found a pooled OR of 2.94 (95% CI, 2.30 to 3.75) associating delirium with mortality, a finding that is in keeping with the unadjusted pooled OR found in our study. Therefore, we suggest that the divergence of our findings from those of Witlox *et al.*<sup>8</sup> are accounted for by an approach to confounder control that was specifically defined for perioperative patients in our study and/or potential differences between the pathophysiology of postoperative delirium in medical *versus* surgical patients. In fact, there is some evidence suggesting that delirium in patients with hip fractures is more likely to result in complete recovery than other forms of delirium.<sup>71</sup>

Although our findings do not support an independent association between postoperative delirium and mortality, this finding is not conclusive. First, only two of 34 studies that we identified had adequate control for confounding based on a minimum set of required variables. Our six predefined confounding variables likely represent a set of factors that are necessary but not fully sufficient to control for confounding in the delirium–mortality relationship. In addition, our inclusion criteria did not specify required methods for confounder definitions, handling of quantitative variables, or statistical methods that would be preferred in low risk-of-bias observational studies. Next, studies in



our primary analysis included only patients undergoing hip surgery; therefore, we are unable to generalize our findings to other noncardiac surgery populations and, in particular, to patients undergoing elective surgery. Finally, the two studies included in our analysis featured two different outcome ascertainment periods (30 days *vs.* 49 months), and although neither found a significant difference in mortality, they each reported a different directional association (short-term follow-up study-adjusted OR = 0.46; long-term follow-up study-adjusted HR = 1.2). Therefore, if the relationship between incident delirium and postoperative mortality is to be understood in a fashion that allows for causal inference and evidence-based clinical care, appropriately powered multicentered studies of relevant patient populations with a reliable delirium definition, complete capture of long-term mortality, granular control for confounding using best-practice methods in observational research, and a time-to-event analysis will be needed.

Until such studies are available, clinicians should consider the following when interpreting our results. Although our article suggests that delirium may not independently change the risk of mortality, there are many other reasons that clinicians might seek to prevent delirium in the perioperative setting. Delirium can be a frightening and unpleasant experience for patients and their families. In addition, we have not assessed the impact of delirium on other important outcomes. Finally, many interventions used to decrease delirium risk (*e.g.*, orientation, mobilization, and opioid sparing analgesia,) would likely positively impact other geriatric-specific risks. The available literature does not support an independent association between delirium and mortality after noncardiac surgery. However, unadjusted results indicate that patients who develop delirium are at an increased risk of death. As the risk of bias decreased, the association between delirium and mortality decreased; and in the lowest risk-of-bias studies, no association was present. Therefore, given the increasing population of older patients presenting for surgery, low risk-of-bias studies are urgently needed to solidify our understanding of the delirium–postoperative mortality relationship.

## Acknowledgments

The authors acknowledge Sascha Davis, Information Specialist (Learning Services, The Ottawa Hospital, Ottawa, Ontario, Canada), for her assistance in developing and executing our search.

## Research Support

Support was provided solely from institutional and/or departmental sources.

## Competing Interests

Dr. McIsaac acknowledges salary support and use of DistillerSR from The Ottawa Hospital Department of Anesthesiology. Dr. Hamilton is a Canadian Frailty Network Highly Qualified Person. The authors declare no competing interests.

## Correspondence

Address correspondence to Dr. McIsaac: Department of Anesthesiology, 1053 Carling Ave, Ottawa, Ontario K1Y 4E9, Canada. dmcisaac@toh.ca. Information on purchasing reprints may be found at [www.anesthesiology.org](http://www.anesthesiology.org) or on the masthead page at the beginning of this issue. ANESTHESIOLOGY's articles are made freely accessible to all readers, for personal use only, 6 months from the cover date of the issue.

## References

1. American Psychiatric Association: Diagnostic and Statistical Manual of Mental Disorders: DSM-5. Washington, American Psychiatric Association, 2013
2. Inouye SK, Westendorp RG, Saczynski JS: Delirium in elderly people. *Lancet* 2014; 383:911–22
3. Centers for Disease Control and Prevention (CDC): NCHS National Hospital Discharge Survey 2010. Available at: <http://www.cdc.gov/nchs/fastats/inpatient-surgery.htm>. Accessed October 3, 2016
4. Takeuchi M, Takeuchi H, Fujisawa D, Miyajima K, Yoshimura K, Hashiguchi S, Ozawa S, Ando N, Shirahase J, Kitagawa Y, Mimura M: Incidence and risk factors of postoperative delirium in patients with esophageal cancer. *Ann Surg Oncol* 2012; 19:3963–70
5. van Munster BC, Thomas C, Kreisel SH, Brouwer JP, Nanninga S, Kopitz J, de Rooij SE: Longitudinal assessment of serum anticholinergic activity in delirium of the elderly. *J Psychiatr Res* 2012; 46:1339–45
6. Pitkala KH, Laurila JV, Strandberg TE, Tilvis RS: Prognostic significance of delirium in frail older people. *Dement Geriatr Cogn Disord* 2005; 19:158–63
7. Inouye SK: Delirium in older persons. *N Engl J Med* 2006; 354:1157–65
8. Witlox J, Eurelings LS, de Jonghe JF, Kalisvaart KJ, Eikelenboom P, van Gool WA: Delirium in elderly patients and the risk of postdischarge mortality, institutionalization, and dementia: a meta-analysis. *JAMA* 2010; 304:443–51
9. Saczynski JS, Marcantonio ER, Quach L, Fong TG, Gross A, Inouye SK, Jones RN: Cognitive trajectories after postoperative delirium. *N Engl J Med* 2012; 367:30–9
10. Bilimoria KY, Liu Y, Paruch JL, Zhou L, Kniecik TE, Ko CY, Cohen ME: Development and evaluation of the universal ACS NSQIP surgical risk calculator: A decision aid and informed consent tool for patients and surgeons. *J Am Coll Surg* 2013; 217:833–42.e1–3
11. Gottschalk A, Hubbs J, Vikani AR, Gottschalk LB, Sieber FE: The impact of incident postoperative delirium on survival of elderly patients after surgery for hip fracture repair. *Anesth Analg* 2015; 121:1336–43
12. Dubljanin-Raspopović E, Markovic Denic L, Marinkovic J, Radinovic K, Ilic N, Tomanovic Vujadinovic S, Kadija M: Early mortality after hip fracture: what matters? *Psychogeriatrics* 2015; 15:95–101
13. Dubljanin-Raspopović E, Markovic Denic L, Marinković J, Grajić M, Tomanovic Vujadinović S, Bumbaširević M: Use of early indicators in rehabilitation process to predict one-year mortality in elderly hip fracture patients. *Hip Int* 2012; 22:661–7
14. Elie M, Cole MG, Primeau FJ, Bellavance F: Delirium risk factors in elderly hospitalized patients. *J Gen Intern Med* 1998; 13:204–12
15. NICE: Delirium: Diagnosis, prevention and management. NICE Clin Guidel 2014; 103. Available at: [www.nice.org.uk/CG103](http://www.nice.org.uk/CG103). Accessed October 2, 2016
16. Fong TG, Jones RN, Marcantonio ER, Tommet D, Gross AL, Habtemariam D, Schmitt E, Yap L, Inouye SK: Adverse outcomes after hospitalization and delirium in persons with Alzheimer disease. *Ann Intern Med* 2012; 156:848–56, W296

17. Seitz DP, Gill SS, Gruneir A, Austin PC, Anderson GM, Bell CM, Rochon PA: Effects of dementia on postoperative outcomes of older adults with hip fractures: A population-based study. *J Am Med Dir Assoc* 2014; 15:334–41
18. Salluh JJ, Wang H, Schneider EB, Nagaraja N, Yenokyan G, Damluji A, Serafim RB, Stevens RD: Outcome of delirium in critically ill patients: Systematic review and meta-analysis. *BMJ* 2015; 350:h2538
19. Stroup DF, Berlin JA, Morton SC, Olkin I, Williamson GD, Rennie D, Moher D, Becker BJ, Sipe TA, Thacker SB: Meta-analysis of observational studies in epidemiology: a proposal for reporting: Meta-analysis of Observational Studies in Epidemiology (MOOSE) group. *JAMA* 2000; 283:2008–12
20. Higgins J, Green S: *Cochrane Handbook for Systematic Reviews of Interventions* Version 5.1.0 [updated March 2011]. *Cochrane Collab* 2011. Available at: [www.handbook.cochrane.org](http://www.handbook.cochrane.org). Accessed April 24, 2016
21. Moher D, Liberati A, Tetzlaff J, Altman DG; PRISMA Group: Preferred reporting items for systematic reviews and meta-analyses: the PRISMA statement. *Ann Intern Med* 2009; 151:264–9, W64
22. McGowan J, Sampson M, Salzweid DM, Cogo E, Foerster V, Lefebvre C: PRESS Peer review of electronic search strategies: 2015 guideline statement. *J Clin Epidemiol* 2016; 75:40–6
23. American Psychiatric Association: *Diagnostic and Statistical Manual of Mental Disorders*. 3rd ed. Washington, American Psychiatric Association, 1980
24. Sterne JAC, Higgins JPT, Reeves BC; on behalf of the development group for ACROBAT-NRSI: A Cochrane Risk Of Bias Assessment Tool: for Non-Randomized Studies of Interventions (ACROBAT-NRSI), version 1.0.0. 2014. Available at: <http://www.riskofbias.info>. Accessed April 24, 2016
25. Young J, Inouye SK: Delirium in older people. *BMJ* 2007; 334:842–6
26. Mohanty S, Rosenthal RA, Russell MM, Neuman MD, Ko CY, Esnaola NF: Optimal perioperative management of the geriatric patient: A best practices guideline from the American College of Surgeons NSQIP and the American Geriatrics Society. *J Am Coll Surg* 2016; 222:930–47
27. Dales LG, Ury HK: An improper use of statistical significance testing in studying covariables. *Int J Epidemiol* 1978; 7:373–5
28. Hernán MA, Hernández-Díaz S, Werler MM, Mitchell AA: Causal knowledge as a prerequisite for confounding evaluation: an application to birth defects epidemiology. *Am J Epidemiol* 2002; 155:176–84
29. Robins JM, Greenland S: The role of model selection in causal inference from nonexperimental data. *Am J Epidemiol* 1986; 123:392–402
30. Sun GW, Shook TL, Kay GL: Inappropriate use of bivariable analysis to screen risk factors for use in multivariable analysis. *J Clin Epidemiol* 1996; 49:907–16
31. Jung SW, Park SC, Rim JS: The risk factor of delirium after transurethral resection of the prostate. *Korean J Urol* 2006; 47:953–7
32. Vieta E, de Pablo J, Cirera E, Pujol A, Grande L, Rimola A, Visa J: Postoperative psychiatric complications following liver transplantation [in Spanish]. *Med Clin (Barc)* 1993; 100:210–3
33. Moher D, Shamseer L, Clarke M, Ghersi D, Liberati A, Petticrew M, Shekelle P, Stewart LA; PRISMA-P Group: Preferred reporting items for systematic review and meta-analysis protocols (PRISMA-P) 2015 statement. *Syst Rev* 2015; 4:1
34. Radinovic K, Markovic-Denic L, Dubljanin-Raspopovic E, Marinkovic J, Milan Z, Bumbasirevic V: Estimating the effect of incident delirium on short-term outcomes in aged hip fracture patients through propensity score analysis. *Geriatr Gerontol Int* 2015; 15:848–55
35. Radinovic KS, Markovic-Denic L, Dubljanin-Raspopovic E, Marinkovic J, Jovanovic LB, Bumbasirevic V: Effect of the overlap syndrome of depressive symptoms and delirium on outcomes in elderly adults with hip fracture: a prospective cohort study. *J Am Geriatr Soc* 2014; 62:1640–8
36. Abelha FJ, Luis C, Veiga D, Parente D, Fernandes V, Santos P, Botelho M, Santos A, Santos C: Outcome and quality of life in patients with postoperative delirium during an ICU stay following major surgery. *Crit Care* 2013; 17:R257
37. Veiga D, Luis C, Parente D, Abelha F: Outcome after hepatectomy-delirium as an independent predictor for mortality. *BMC Anesthesiol* 2013; 13:4
38. Veiga D, Luis C, Parente D, Fernandes V, Botelho M, Santos P, Abelha F: Postoperative delirium in intensive care patients: Risk factors and outcome. *Brazilian J Anesthesiol* 2012; 62:469–83
39. Bickel H, Gradingier R, Kochs E, Förstl H: High risk of cognitive and functional decline after postoperative delirium: A three-year prospective study. *Dement Geriatr Cogn Disord* 2008; 26:26–31
40. Nightingale S, Holmes J, Mason J, House A: Psychiatric illness and mortality after hip fracture. *Lancet* 2001; 357:1264–5
41. Holmes J, House A: Psychiatric illness predicts poor outcome after surgery for hip fracture: a prospective cohort study. *Psychol Med* 2000; 30:921–9
42. Furlaneto ME, Garcez-Leme LE: Impact of delirium on mortality and cognitive and functional performance among elderly people with femoral fractures. *Clinics (Sao Paulo)* 2007; 62:545–52
43. Hempenius L, Slaets JP, van Asselt D, de Bock TH, Wiggers T, van Leeuwen BL: Long term outcomes of a geriatric liaison intervention in frail elderly cancer patients. *PLoS One* 2016; 11:e0143364
44. Raats JW, Steunenberg SL, Crolla RM, Wijsman JH, te Slaa A, van der Laan L: Postoperative delirium in elderly after elective and acute colorectal surgery: A prospective cohort study. *Int J Surg* 2015; 18:216–9
45. Raats JW, van Eijdsen WA, Crolla RM, Steyerberg EW, van der Laan L: Risk factors and outcomes for postoperative delirium after major surgery in elderly patients. *PLoS One* 2015; 10:e0136071
46. Carnevali L, Bellelli G, Mazzola P, Aletti G, Corsi M, Annoni G: Effect of the overlap syndrome of depressive symptoms and delirium on outcomes in elderly adults with hip fracture: A comment. *J Am Geriatr Soc* 2015; 63:1051–3
47. Visser L, Prent A, van der Laan MJ, van Leeuwen BL, Izaks GJ, Zeebregts CJ, Pol RA: Predicting postoperative delirium after vascular surgical procedures. *J Vasc Surg* 2015; 62:183–9
48. Parente D, Luis C, Veiga D, Silva H, Abelha F: Congestive heart failure as a determinant of postoperative delirium. *Rev Port Cardiol* 2013; 32:665–71
49. Large MC, Reichard C, Williams JT, Chang C, Prasad S, Leung Y, DuBeau C, Bales GT, Steinberg GD: Incidence, risk factors, and complications of postoperative delirium in elderly patients undergoing radical cystectomy. *Urology* 2013; 81:123–8
50. Kat MG, de Jonghe JF, Vreeswijk R, van der Ploeg T, van Gool WA, Eikelenboom P, Kalisvaart KJ: Mortality associated with delirium after hip-surgery: A 2-year follow-up study. *Age Ageing* 2011; 40:312–8
51. Brouquet A, Cudennec T, Benoist S, Moulias S, Beauchet A, Penna C, Teillet L, Nordlinger B: Impaired mobility, ASA status and administration of tramadol are risk factors for postoperative delirium in patients aged 75 years or more after major abdominal surgery. *Ann Surg* 2010; 251:759–65
52. Koebrugge B, van Wensen RJ, Bosscha K, Dautzenberg PL, Koning OH: Delirium after emergency/elective open and endovascular aortoiliac surgery at a surgical ward with a high-standard delirium care protocol. *Vascular* 2010; 18:279–87

53. Ansaloni L, Catena F, Chattat R, Fortuna D, Franceschi C, Mascitti P, Melotti RM: Risk factors and incidence of postoperative delirium in elderly patients after elective and emergency surgery. *Br J Surg* 2010; 97:273–80
54. Robinson TN, Raeburn CD, Tran ZV, Angles EM, Brenner LA, Moss M: Postoperative delirium in the elderly: Risk factors and outcomes. *Ann Surg* 2009; 249:173–8
55. Koebrugge B, Koek HL, van Wensen RJ, Dautzenberg PL, Bosscha K: Delirium after abdominal surgery at a surgical ward with a high standard of delirium care: Incidence, risk factors and outcomes. *Dig Surg* 2009; 26:63–8
56. Kat MG, Vreeswijk R, de Jonghe JFM, van der Ploeg T, van Gool WA, Eikelenboom P, Kalisvaart KJ: Long-term cognitive outcome of delirium in elderly hip surgery patients. *Dement Geriatr Cogn Disord* 2008; 26:1–8
57. Minden SL, Carbone LA, Barsky A, Borus JF, Fife A, Fricchione GL, Orav EJ: Predictors and outcomes of delirium. *Gen Hosp Psychiatry* 2005; 27:209–14
58. Zakriya K, Sieber FE, Christmas C, Wenz JF Sr, Franckowiak S: Brief postoperative delirium in hip fracture patients affects functional outcome at three months. *Anesth Analg* 2004; 98:1798–802, table of contents
59. Lundström M, Edlund A, Bucht G, Karlsson S, Gustafson Y: Dementia after delirium in patients with femoral neck fractures. *J Am Geriatr Soc* 2003; 51:1002–6
60. Edlund A, Lundström M, Brännström B, Bucht G, Gustafson Y: Delirium before and after operation for femoral neck fracture. *J Am Geriatr Soc* 2001; 49:1335–40
61. Milisen K, Foreman MD, Abraham IL, De Geest S, Godderis J, Vandermeulen E, Fischler B, Delooz HH, Spiessens B, Broos PL: A nurse-led interdisciplinary intervention program for delirium in elderly hip-fracture patients. *J Am Geriatr Soc* 2001; 49:523–32
62. Neufeld KJ, Leoutsakos JM, Sieber FE, Wanamaker BL, Gibson Chambers JJ, Rao V, Schretlen DJ, Needham DM: Outcomes of early delirium diagnosis after general anesthesia in the elderly. *Anesth Analg* 2013; 117:471–8
63. Neufeld KJ, Leoutsakos JM, Oh E, Sieber FE, Chandra A, Ghosh A, Schretlen DJ, Needham DM: Long-term outcomes of older adults with and without delirium immediately after recovery from general anesthesia for surgery. *Am J Geriatr Psychiatry* 2015; 23:1067–74
64. Edelstein DM, Aharonoff GB, Karp A, Capla EL, Zuckerman JD, Koval KJ: Effect of postoperative delirium on outcome after hip fracture. *Clin Orthop Relat Res* 2004:195–200
65. Gallagher TK, McErlean S, O'Farrell A, Hoti E, Maguire D, Traynor OJ, Conlon KC, Geoghegan JG: Incidence and risk factors of delirium in patients post pancreaticoduodenectomy. *HPB (Oxford)* 2014; 16:864–9
66. Liu P, Li YW, Wang XS, Zou X, Zhang DZ, Wang DX, Li SZ: High serum interleukin-6 level is associated with increased risk of delirium in elderly patients after noncardiac surgery: a prospective cohort study. *Chin Med J (Engl)* 2013; 126:3621–7
67. Kawaguchi Y, Kanamori M, Ishihara H, Abe Y, Nobukiyo M, Sigeta T, Hori T, Kimura T: Postoperative delirium in spine surgery. *Spine J* 2006; 6:164–9
68. Brännström B, Gustafson Y, Norberg A, Winblad B: Problems of basic nursing care in acutely confused and non-confused hip-fracture patients. *Scand J Caring Sci* 1989; 3:27–34
69. Harris RJ, Bradburn MJ, Deeks JJ, Altman DG, Harbord RM, Sterne JAC: Metan: Fixed- and random-effects meta-analysis. *Stata J* 2008; 8:3–28
70. Smith T, Li X, Nylander W, Gunnar W: Thirty-day postoperative mortality risk estimates and 1-year survival in veterans health administration surgery patients. *JAMA Surg* 2016; 151:417–22
71. Brauer C, Morrison RS, Silberzweig SB, Siu AL: The cause of delirium in patients with hip fracture. *Arch Intern Med* 2000; 160:1856–60
